# Supplementary material
Source: PubMed Central journal article supplement (PMC2730377)
Supplement: NIHMS131818-supplement-Supp_Table_1.pdf [file NIHMS131818-supplement-Supp_Table_1.pdf]

**Supplementary Table 1.** Genes implicated in behavioral pain-related states via antisense knockdown or RNA interference.

| Phenotype               | Gene Symbol                                                        | Gene Name                                               | Protein Acronym |
|-------------------------|--------------------------------------------------------------------|---------------------------------------------------------|-----------------|
| <b>Acute/Tonic Pain</b> | <i>Avpr2</i>                                                       | arginine vasopressin receptor 2                         | V2R             |
|                         | <i>Bdkrb1</i>                                                      | bradykinin receptor, beta 1                             | B1R             |
|                         | <i>Bdkrb2</i>                                                      | bradykinin receptor, beta 2                             | B2R             |
|                         | <i>Cacng2</i>                                                      | calcium channel, voltage-dependent, gamma subunit 2     | stargazin       |
|                         | <i>Chat</i>                                                        | choline acetyltransferase                               | ChAT            |
|                         | <i>Chrna4</i>                                                      | cholinergic receptor, nicotinic, alpha polypeptide 4    | $\alpha$ 4-AChR |
|                         | <i>Fos</i>                                                         | FBJ osteosarcoma oncogene                               | c-fos           |
|                         | <i>Gnat1</i>                                                       | guanine nucleotide binding protein, alpha transducing 1 | Ga1             |
|                         | <i>Gnat2</i>                                                       | guanine nucleotide binding protein, alpha transducing 2 | Ga2             |
|                         | <i>Grin1</i>                                                       | glutamate receptor, ionotropic, NMDA1 (zeta 1)          | NR1             |
|                         | <i>Grin2a</i>                                                      | glutamate receptor, ionotropic, NMDA2A (epsilon 1)      | NR2A            |
|                         | <i>Grm1</i>                                                        | glutamate receptor, metabotropic 1                      | mGluR1          |
|                         | <i>Htr1a</i>                                                       | 5-Hydroxytryptamine (serotonin) receptor 1A             | 5-HTR1A         |
|                         | <i>Mapk14</i>                                                      | mitogen-activated protein kinase 14                     | p38a            |
|                         | <i>Mycbp2</i>                                                      | MYC binding protein 2                                   | Pam             |
|                         | <i>Npff</i>                                                        | neuropeptide FF-amide peptide precursor                 | NPFF            |
|                         | <i>Oprl1</i>                                                       | opioid-receptor-like 1                                  | ORL1            |
|                         | <i>Ptges3</i>                                                      | prostaglandin E synthase 3 (cytosolic)                  | cPGES           |
|                         | <i>Slc1a2</i>                                                      | solute carrier family 1, member 2                       | GLT-1           |
|                         | <i>Slc1a3</i>                                                      | solute carrier family 1, member 3                       | GLAST           |
| <i>Syn2</i>             | synapsin II                                                        | synapsin II                                             |                 |
| <i>Tac1</i>             | tachykinin 1                                                       | NK1                                                     |                 |
| <i>Trpv4</i>            | transient receptor potential cation channel, subfamily V, member 4 | TRPV4                                                   |                 |

|                          |                |                                                                    |                     |
|--------------------------|----------------|--------------------------------------------------------------------|---------------------|
| <b>Inflammatory Pain</b> | <i>Accn2</i>   | amiloride-sensitive cation channel 2, neuronal                     | ASIC1               |
|                          | <i>Bdnf</i>    | brain-derived neurotrophic factor                                  | BDNF                |
|                          | <i>Cacna1b</i> | calcium channel, voltage-dependent, N type, alpha 1B subunit       | Cav2.2              |
|                          | <i>Calca</i>   | calcitonin/calcitonin-related polypeptide, alpha                   | CGRP                |
|                          | <i>Creb1</i>   | cAMP responsive element binding protein 1                          | CREB                |
|                          | <i>Dlg2</i>    | discs, large homolog 2 ( <i>Drosophila</i> )                       | PSD93               |
|                          | <i>Fos</i>     | FBJ osteosarcoma oncogene                                          | <i>c-fos</i>        |
|                          | <i>Gla3</i>    | glycine receptor, alpha 3 subunit                                  | GlyR $\alpha$ 3     |
|                          | <i>Grin1</i>   | glutamate receptor, ionotropic, NMDA1 (zeta 1)                     | NR1                 |
|                          | <i>Grm1</i>    | glutamate receptor, metabotropic 1                                 | mGluR1              |
|                          | <i>Il6st</i>   | interleukin 6 signal transducer                                    | gp130               |
|                          | <i>Itgal</i>   | integrin alpha 1                                                   | $\alpha$ 1-integrin |
|                          | <i>Itga3</i>   | integrin alpha 3                                                   | $\alpha$ 3-integrin |
|                          | <i>Itgb1</i>   | integrin beta 1 (fibronectin receptor beta)                        | $\beta$ 1-integrin  |
|                          | <i>Lpar1</i>   | lysophosphatidic acid receptor 1                                   | vzg-1               |
|                          | <i>Mapk7</i>   | mitogen-activated protein kinase 7                                 | ERK5                |
|                          | <i>Ntrk1</i>   | neurotrophic tyrosine kinase, receptor, type 1                     | TrkA                |
|                          | <i>Ntrk2</i>   | neurotrophin tyrosine kinase, receptor, type 2                     | TrkB                |
|                          | <i>P2rx3</i>   | purinergic receptor P2X, ligand-gated ion channel, 3               | P2X3                |
|                          | <i>Plcb3</i>   | phospholipase C, beta 3                                            | PLC $\beta$ 3       |
|                          | <i>Prkce</i>   | protein kinase C, epsilon                                          | PKC $\epsilon$      |
|                          | <i>Prkd1</i>   | protein kinase D1                                                  | PKD1                |
|                          | <i>Ptger4</i>  | prostaglandin E receptor 4 (subtype EP4)                           | EP4                 |
|                          | <i>Ptges3</i>  | prostaglandin E synthase 3 (cytosolic)                             | cPGES               |
|                          | <i>Ptgfrn</i>  | prostaglandin F2 receptor negative regulator                       | PGF2 $\alpha$       |
|                          | <i>Scn10a</i>  | sodium channel, voltage-gated, type X, alpha                       | Nav1.8              |
|                          | <i>Scn9a</i>   | sodium channel, voltage-gated, type IX, alpha                      | Nav1.7              |
|                          | <i>Sgk1</i>    | serum/glucocorticoid regulated kinase 1                            | Sgk1                |
|                          | <i>Slc12a5</i> | solute carrier family 12, member 5                                 | KCC2                |
|                          | <i>Trpv4</i>   | transient receptor potential cation channel, subfamily V, member 4 | TRPV4               |

|                         |                 |                                                                     |                       |
|-------------------------|-----------------|---------------------------------------------------------------------|-----------------------|
| <b>Neuropathic Pain</b> | <i>Arrb1</i>    | arrestin, beta 1                                                    | $\beta$ 1-arrestin    |
|                         | <i>Bloc1s2</i>  | biogenesis of lysosome-related organelles complex-1, subunit 2      | RSEP1                 |
|                         | <i>Cacna1b</i>  | calcium channel, voltage-dependent, N type, alpha 1B subunit        | Cav2.2                |
|                         | <i>Cacna1h</i>  | calcium channel, voltage-dependent, T type, alpha 1H subunit        | Cav3.2                |
|                         | <i>Cacna1i</i>  | calcium channel, voltage-dependent, T type, alpha 1I subunit        | Cav3.3                |
|                         | <i>Cacna2d1</i> | calcium channel, voltage-dependent, alpha2/delta subunit 1          | $\alpha$ 2 $\delta$ 1 |
|                         | <i>Chrna5</i>   | cholinergic receptor, nicotinic, alpha polypeptide 5                | $\alpha$ 5-AChR       |
|                         | <i>Creb1</i>    | cAMP responsive element binding protein 1                           | CREB                  |
|                         | <i>Dlg4</i>     | discs, large homolog 4 (Drosophila)                                 | PSD95                 |
|                         | <i>Epha4</i>    | Eph receptor A4                                                     | EphA4                 |
|                         | <i>Efnb2</i>    | ephrin B2                                                           | ephrin B2             |
|                         | <i>Gfra1</i>    | glial cell line derived neurotrophic factor family receptor alpha 1 | GFRa1                 |
|                         | <i>Grm1</i>     | glutamate receptor, metabotropic 1                                  | mGluR1                |
|                         | <i>Htr1a</i>    | 5-Hydroxytryptamine (serotonin) receptor 1A                         | 5-HTR1A               |
|                         | <i>Jun</i>      | Jun oncogene                                                        | c-jun                 |
|                         | <i>Kcnc4</i>    | potassium voltage gated channel, Shaw-related subfamily, member 4   | Kv3.4                 |
|                         | <i>Kcnd3</i>    | potassium voltage gated channel, Shal-related subfamily, member 3   | Kv4.3                 |
|                         | <i>Mapk1</i>    | mitogen-activated protein kinase 1                                  | ERK                   |
|                         | <i>Mapk7</i>    | mitogen-activated protein kinase 7                                  | ERK5                  |
|                         | <i>Nr2c2</i>    | nuclear receptor subfamily 2, group C, member 2                     | TAK1                  |
|                         | <i>Nr3c1</i>    | nuclear receptor subfamily 3, group C, member 1                     | GR                    |
|                         | <i>P2rx3</i>    | purinergic receptor P2X, ligand-gated ion channel, 3                | P2X3                  |
|                         | <i>P2rx4</i>    | purinergic receptor P2X, ligand-gated ion channel 4                 | P2X4                  |
|                         | <i>P2ry12</i>   | purinergic receptor P2Y, G-protein coupled 12                       | P2Y12                 |
|                         | <i>Rela</i>     | v-rel reticuloendotheliosis viral oncogene homolog A (avian)        | p65                   |
|                         | <i>Scn10a</i>   | sodium channel, voltage-gated, type X, alpha                        | Nav1.8                |
|                         | <i>Scn3a</i>    | sodium channel, voltage-gated, type III, alpha                      | Nav1.3                |
|                         | <i>Tlr3</i>     | toll-like receptor 3                                                | TLR3                  |
|                         | <i>Tlr4</i>     | toll-like receptor 4                                                | TLR4                  |
|                         | <i>Trpa1</i>    | transient receptor potential cation channel, subfamily A, member 1  | TRPA1                 |
|                         | <i>Trpm8</i>    | transient receptor potential cation channel, subfamily M, member 8  | TRPM8                 |
|                         | <i>Trpv1</i>    | transient receptor potential cation channel, subfamily V, member 1  | TRPV1                 |
|                         | <i>Trpv4</i>    | transient receptor potential cation channel, subfamily V, member 4  | TRPV4                 |

|                  |               |                                                                     |                   |
|------------------|---------------|---------------------------------------------------------------------|-------------------|
| <b>Analgesia</b> | <i>Adra2a</i> | adrenergic receptor, alpha 2a                                       | $\alpha$ 2a-AR    |
|                  | <i>Adra2c</i> | adrenergic receptor, alpha 2c                                       | $\alpha$ 2c-AR    |
|                  | <i>Chrm1</i>  | cholinergic receptor, muscarinic 1, CNS                             | M1                |
|                  | <i>Chrna4</i> | cholinergic receptor, nicotinic, alpha polypeptide 4                | $\alpha$ 4-AChR   |
|                  | <i>Cnr1</i>   | cannabinoid receptor 1 (brain)                                      | CB1               |
|                  | <i>Drd2</i>   | dopamine receptor 2                                                 | D2                |
|                  | <i>Galr1</i>  | galanin receptor 1                                                  | Galnr1            |
|                  | <i>Gfra1</i>  | glial cell line derived neurotrophic factor family receptor alpha 1 | GFR $\alpha$ 1    |
|                  | <i>Gnao1</i>  | guanine nucleotide binding protein, alpha O                         | Go                |
|                  | <i>Gnat1</i>  | guanine nucleotide binding protein, alpha transducing 1             | G $\alpha$ 1      |
|                  | <i>Gnat2</i>  | guanine nucleotide binding protein, alpha transducing 2             | G $\alpha$ 2      |
|                  | <i>Gnat3</i>  | guanine nucleotide binding protein, alpha transducing 3             | G $\alpha$ 3      |
|                  | <i>Gnaz</i>   | guanine nucleotide binding protein, alpha z subunit                 | Gz                |
|                  | <i>Gnb5</i>   | guanine nucleotide binding protein (G protein), beta 5              | G $\beta$ 5       |
|                  | <i>Gng2</i>   | guanine nucleotide binding protein (G protein), gamma 2             | G $\gamma$ 2      |
|                  | <i>Grin1</i>  | glutamate receptor, ionotropic, NMDA1 (zeta 1)                      | NR1               |
|                  | <i>Htr3</i>   | 5-hydroxytryptamine (serotonin) receptor 3                          | 5-HT3             |
|                  | <i>Itp1</i>   | inositol 1,4,5-triphosphate receptor 1                              | IP3R1             |
|                  | <i>Itp2</i>   | inositol 1,4,5-triphosphate receptor 2                              | IP3R2             |
|                  | <i>Itp3</i>   | inositol 1,4,5-triphosphate receptor 3                              | IP3R3             |
|                  | <i>Kcna1</i>  | potassium voltage-gated channel, shaker-related subfamily, member 1 | Kv1.1             |
|                  | <i>Ncam1</i>  | neural cell adhesion molecule 1                                     | NCAM              |
|                  | <i>Nos1</i>   | nitric oxide synthase 1, neuronal                                   | nNOS              |
|                  | <i>Oprd1</i>  | opioid receptor, delta 1                                            | DOR               |
|                  | <i>Oprk1</i>  | opioid receptor, kappa 1                                            | KOR               |
|                  | <i>Oprl1</i>  | opioid-receptor-like 1                                              | ORL1              |
|                  | <i>Oprm1</i>  | opioid receptor, mu 1                                               | MOR               |
|                  | <i>Oprs</i>   | opioid receptor, sigma 1                                            | $\sigma$ receptor |
|                  | <i>P2rx3</i>  | purinergic receptor P2X, ligand-gated ion channel, 3                | P2X3              |
|                  | <i>Plcb1</i>  | phospholipase C, beta 1                                             | PLC $\beta$ 1     |
|                  | <i>Ppp2ca</i> | protein phosphatase 2, catalytic subunit, alpha isoform             | PP2A              |
|                  | <i>Ppp5c</i>  | protein phosphatase 5, catalytic subunit                            | PP5               |
|                  | <i>Rgs9</i>   | regulator of G-protein signaling 9                                  | Rgs9-2            |

Supplemental Material: Annu. Rev. Pharmacol. Toxicol. 2009. 49: 97-121  
doi: 10.1146/annurev-pharmtox-061008-103222  
*Progress in Genetic Studies of Pain and Analgesia*  
LaCroix-Fralish and Mogil

*Ryr1*  
*Ryr3*

ryanodine receptor 1  
ryanodine receptor 3

RYR1  
RYR3

---
