# Supplementary material
Source: PubMed Central journal article supplement (PMC2730377)
Supplement: NIHMS131818-supplement-Supp_Table_2.pdf [file NIHMS131818-supplement-Supp_Table_2.pdf]

**Supplementary Table 2.** Features of published gene expression profiling studies of pain and analgesia.

| Phenotype                       | Subject <sup>a</sup> | Injury <sup>b</sup> | Analgesic <sup>c</sup> Tissue <sup>d</sup> |           | Timing  | Array <sup>e</sup>  | Reference <sup>f</sup> |
|---------------------------------|----------------------|---------------------|--------------------------------------------|-----------|---------|---------------------|------------------------|
| <b><i>Inflammatory Pain</i></b> |                      |                     |                                            |           |         |                     |                        |
|                                 | Male, SD Rat         | 0.25% Carr. at P3   | n.a.                                       | s.c.      | P60     | Custom              | (1)                    |
|                                 | Male, SD Rat         | 0.25% Carr. at P3   | n.a.                                       | PAG       | P60     | Custom              | (2)                    |
|                                 | not reported         | 2% form. at P3,P21  | n.a.                                       | s.c.      | 2 h     | Affy Rat. Neurobio. | (3)                    |
|                                 | Male, Wistar Rat     | 150 µl CFA          | n.a.                                       | DRG, s.c. | 3-14 d  | Atlas Rat 4k        | (4)                    |
|                                 | Male, SD Rat         | 4% Carr.            | n.a.                                       | DRG, paw  | 1-24 h  | SuperArray GEA      | (5)                    |
|                                 | Male, SD Rat         | 10 µl CFA           | n.a.                                       | s.c.      | 2 h-7 d | Affy RAE230         | (6)                    |
|                                 | Male, SD Rat         | 2% Carr.            | n.a.                                       | s.c.      | 1-28 d  | Affy RAE230         | (7)                    |
| <b><i>Neuropathic Pain</i></b>  |                      |                     |                                            |           |         |                     |                        |
|                                 | Male, SD Rat         | CCI                 | n.a.                                       | DRG       | 7 d     | Diff. Display       | (8)                    |
|                                 | Male, SD Rat         | S1/S2 tx            | n.a.                                       | s.c.      | 21 d    | Incyte Mouse 1.1    | (9)                    |
|                                 | Male, SD Rat         | Sciatic tx          | n.a.                                       | DRG       | 1-14 d  | Affy RGU34A         | (10)                   |
|                                 | SD Rat               | Sciatic tx          | n.a.                                       | DRG       | 2-28 d  | Atlas Rat 1.2       | (11)                   |
|                                 | Male, SD Rat         | SNL                 | n.a.                                       | DRG, s.c. | 13 d    | Affy RGU34A         | (12)                   |
|                                 | Male, SD Rat         | SNL                 | n.a.                                       | s.c.      | 13 d    | Affy RGU34A         | (13)                   |
|                                 | Male, B6 Mouse       | Sciatic tx          | n.a.                                       | DRG       | 7 d     | Incyte Mouse GEM    | (14)                   |
|                                 | SD Rat*              | SNL                 | n.a.                                       | DRG       | 14 d    | Affy RGU34A         | (15)                   |
|                                 | Male, SD Rat         | Sciatic tx          | n.a.                                       | s.c.      | 14 d    | Atlas Rat 1.2       | (16)                   |
|                                 | Male, SD Rat         | SCI                 | n.a.                                       | s.c.      | 28 d    | Affy RGA            | (17)                   |
|                                 | Male, SD Rat         | L5 tx, LR           | n.a.                                       | s.c.      | 7-14 d  | Affy RAE230A        | (18)                   |
|                                 | Male, Wistar Rat     | CCI                 | n.a.                                       | DRG, s.c. | 3-14 d  | Atlas Rat 4k        | (4)                    |
|                                 | Male, SD Rat         | CCI, SNI, SNL       | n.a.                                       | s.c.      | 3-40 d  | Affy RGU34A         | (19)                   |

### Clinical Pain

|       |                  |      |       |      |              |      |
|-------|------------------|------|-------|------|--------------|------|
| Human | BPI              | n.a. | DRG   | ?    | Affy Hu6800  | (20) |
| Human | Cluster Headache | n.a. | Blood | n.a. | Affy HG-U133 | (21) |

### Analgesia

|              |               |       |           |        |                  |      |
|--------------|---------------|-------|-----------|--------|------------------|------|
| Male, SD Rat | S1/S2 tx      | EA    | s.c.      | 30 min | Incyte Mouse 1.1 | (9)  |
| Human        | n.a.          | Acup. | Blood     | 1 h    | CodeLink 20K     | (22) |
| Human        | Post-surgical | ROF   | OM        | 2 d    | Affy HG-U133     | (23) |
| Rat          | n.a.          | EA    | Hypothal. | 1 h    | unknown          | (24) |
| Human        | Post-surgical | ROF   | OM        | 2 d    | Affy HG-U133     | (25) |

<sup>a</sup> SD: Sprague Dawley

<sup>b</sup> BPI: brachial plexus injury (causing DRG avulsion); Carr.: carrageenan; CCI: chronic constriction injury; CFA: complete Freund's adjuvant; form.: formalin; SCI: spinal cord injury (T10 contusion); SNI: spared nerve injury; SNL: spinal nerve ligation; tx: transection; LR: lumbar radiculopathy

<sup>c</sup> Acup.: acupuncture (needle-based); EA: electroacupuncture; ROF: 50 mg rofecoxib

<sup>d</sup> DRG: dorsal root ganglia; Hypothal.: hypothalamus; OM: oral mucosa; PAG: periaqueductal gray; s.c.: spinal cord

<sup>e</sup> Diff. Display: differential display technique

<sup>f</sup> (1) Ren et al. 2005. *Mol. Pain* 1:27; (2) Anseloni et al. 2005. *Neuroscience* 131:635-45; (3) Barr et al. 2005. *Pain* 117:6-18; (4) Rodriguez Parkitna et al. 2006. *J. Physiol. Pharmacol.* 57: 401-14; (5) Yang et al. 2007. *J. Neurochem.* 103: 1628-43; (6) Geranton et al. 2007. *J. Neurosci.* 27: 6163-73; (7) Yukhananov et al. 2008. *BMC Neurosci.* 9: 32; (8) Kim et al. 2001. *Neuroreport* 12: 3401-5; (9) Ko et al. 2002. *J. Biochem. Mol. Biol.* 35: 420-7; (10) Costigan et al. 2002. *BMC Neurosci.* 3: 16; (11) Xiao et al. 2002. *Proc. Natl. Acad. Sci. U.S.A.* 99: 8360-5; (12) Wang et al. 2002. *Neuroscience* 114: 529-46; (13) Sun et al. 2002. *BMC Neurosci.* 3: 11; (14) Bonilla et al. 2002. *J. Neurosci.* 22: 1303-15; (15) Valder et al. 2003. *J. Neurochem.* 87: 560-73; (16) Yang et al. 2004. *Eur. J. Neurosci.* 19: 871-83; (17) Nesic et al. 2005. *J. Neurochem.* 95: 998-1014; (18) LaCroix-Fralish et al. 2006. *Anesthesiology* 104: 1283-92; (19) Griffin et al. 2007. *J. Neurosci.* 27: 8699-708; (20) Rabert et al. 2004. *J. Clin. Neurosci.* 11: 289-99; (21) Sjostrand et al. 2006. *Headache* 46: 1518-34; (22) Chae et al. 2006. *J. Physiol. Sci.* 56: 425-31; (23) Wang et al. 2006. *Clin. Pharmacol. Ther.* 79: 303-15; (24) Gao et al. 2007. *Am. J. Chin. Med.* 35: 767-78; (25) Wang et al. 2007. *Pain* 128: 136-47.

\*Two substrains of Sprague Dawley rat were used; Harlan and Holtzman.
